# Supplementary material for: Nursing, frailty, functional decline and models of care in relation to older people receiving long-term care: a scoping review protocol
Source: HighWire-hosted journal article supplement (doi:10.1136/bmjopen-2022-061303), 2022-08-01
Supplement: bmjopen-2022-061303supp003_data_supplement.pdf [file bmjopen-2022-061303supp003_data_supplement.pdf]

**SUPPLEMENTARY FILE 3****Tentative search strategy: PubMed****Last updated on: 19.01.22****Question 2:** How is the condition of frailty described by key stakeholders in long-term care?

| PubMed   | Search block: Older people (P) |                                                                                                                                                   | 19. Jan 2022 |
|----------|--------------------------------|---------------------------------------------------------------------------------------------------------------------------------------------------|--------------|
| Search # | Query                          | Search string                                                                                                                                     | Results      |
| #1       | Aged                           | "aged"[MeSH Terms] OR "aged"[All Fields]                                                                                                          | 5,765,926    |
| #2       | Elderly                        | "aged"[MeSH Terms] OR "aged"[All Fields] OR "elderly"[All Fields] OR "elderlies"[All Fields] OR "elderly s"[All Fields] OR "elderlys"[All Fields] | 5,823,455    |
| #3       | Older                          | "older"[All Fields] OR "olders"[All Fields]                                                                                                       | 496,898      |
| #4       | Combination:                   | <b>#1 OR #2 OR #3</b>                                                                                                                             | 5,978,243    |

| PubMed   | Search block: Significant others (P) |                                                                                                                           | 19. Jan 2022 |
|----------|--------------------------------------|---------------------------------------------------------------------------------------------------------------------------|--------------|
| Search # | Query                                | Search string                                                                                                             | Results      |
| #5       | Significant others                   | "significant"[All Fields] AND "other*"[All Fields]                                                                        | 763,016      |
| #6       | Informal caregivers                  | "caregivers"[MeSH Terms] OR "caregiver*"[All Fields] OR ("informal"[All Fields] AND "caregiver*"[All Fields])             | 92,958       |
| #7       | Family                               | "family"[MeSH Terms] OR "family"[All Fields] OR "families"[All Fields] OR "family s"[All Fields] OR "familys"[All Fields] | 1,542,673    |
| #8       | Relatives                            | "relative"[All Fields] OR "relatives"[All Fields] OR "relative s"[All Fields]                                             | 984,365      |
| #9       | Family caregivers                    | "caregivers"[MeSH Terms] OR "caregiver*"[All Fields] OR ("family"[All Fields] AND "caregiver*"[All Fields])               | 92,958       |
| #10      | Spouses                              | "spouse s"[All Fields] OR "spouses"[MeSH Terms] OR "spouses"[All Fields] OR "spouse"[All Fields]                          | 34,339       |
| #11      | Husbands                             | "husband s"[All Fields] OR "husband"[All Fields] OR "husbands"[All Fields]                                                | 14,379       |
| #12      | Wives                                | "wife"[All Fields] OR "wives"[All Fields] OR "wife s"[All Fields]                                                         | 11,491       |
| #13      | Next-of-kin                          | "Next-of-kin"[All Fields]                                                                                                 | 1,920        |
| #14      | Combination:                         | <b>#5 OR #6 OR #7 OR #8 OR #9 OR #10 OR #11 OR #12 OR #13</b>                                                             | 3,174,444    |

| PubMed   | Search block: Nursing staff (P) |                                                                                                                        | 19. Jan 2022 |
|----------|---------------------------------|------------------------------------------------------------------------------------------------------------------------|--------------|
| Search # | Query                           | Search string                                                                                                          | Results      |
| #15      | Nurse                           | "nurse s"[All Fields] OR "nurses"[MeSH Terms] OR "nurses"[All Fields] OR "nurse"[All Fields] OR "nurses s"[All Fields] | 408,405      |

|     |                       |                                                                                                                                                                                                                                                                                                                |         |
|-----|-----------------------|----------------------------------------------------------------------------------------------------------------------------------------------------------------------------------------------------------------------------------------------------------------------------------------------------------------|---------|
| #16 | Nursing personnel     | "nursing staff"[MeSH Terms] OR ("nursing"[All Fields] AND "staff"[All Fields]) OR "nursing staff"[All Fields] OR ("nursing"[All Fields] AND "personnel"[All Fields]) OR "nursing personnel"[All Fields] OR "nurses"[MeSH Terms] OR "nurses"[All Fields] OR ("nursing"[All Fields] AND "personnel"[All Fields]) | 365,108 |
| #17 | Healthcare assistants | "allied health personnel"[MeSH Terms] OR ("allied"[All Fields] AND "health"[All Fields] AND "personnel"[All Fields]) OR "allied health personnel"[All Fields] OR ("healthcare"[All Fields] AND "assistants"[All Fields]) OR "healthcare assistants"[All Fields]                                                | 56,879  |
| #18 | Healthcare aides      | ("delivery of health care"[MeSH Terms] OR ("delivery"[All Fields] AND "health"[All Fields] AND "care"[All Fields]) OR "delivery of health care"[All Fields] OR "healthcare"[All Fields] OR "healthcare s"[All Fields] OR "healthcares"[All Fields]) AND "aides"[All Fields]                                    | 1,248   |
| #19 | Nursing assistants    | "nursing assistants"[MeSH Terms] OR ("nursing"[All Fields] AND "assistants"[All Fields]) OR "nursing assistants"[All Fields]                                                                                                                                                                                   | 8,416   |
| #20 | Nursing aides         | ("nursing"[MeSH Terms] OR "nursing"[All Fields] OR "nursings"[All Fields]) AND "aides"[All Fields]                                                                                                                                                                                                             | 1,843   |
| #21 | Formal caregivers     | ("formal"[All Fields] OR "formalized"[All Fields]) AND ("caregiver s"[All Fields] OR "caregivers"[MeSH Terms] OR "caregivers"[All Fields] OR "caregiver"[All Fields] OR "caregiving"[All Fields])                                                                                                              | 2,921   |
| #22 | Combination:          | <b>#15 OR #16 OR #17 OR #18 OR #19 OR #20 OR #21</b>                                                                                                                                                                                                                                                           | 526,064 |

| PubMed   | Search block: Frailty (I) |                                                                                                                          | 19. Jan 2022 |
|----------|---------------------------|--------------------------------------------------------------------------------------------------------------------------|--------------|
| Search # | Query                     | Search string                                                                                                            | Results      |
| #23      | Frail                     | "frail"[All Fields] OR "frails"[All Fields] OR "frailty"[MeSH Terms] OR "frailty"[All Fields] OR "frailness"[All Fields] | 34,147       |

| PubMed   | Search block: Long-term care (C) |                                                                                                                                                                                                                                                                                                                                                                                                        | 19. Jan 2022 |
|----------|----------------------------------|--------------------------------------------------------------------------------------------------------------------------------------------------------------------------------------------------------------------------------------------------------------------------------------------------------------------------------------------------------------------------------------------------------|--------------|
| Search # | Query                            | Search string                                                                                                                                                                                                                                                                                                                                                                                          | Results      |
| #24      | Long-term care                   | "long term care"[MeSH Terms] OR ("long term"[All Fields] AND "care"[All Fields]) OR "long term care"[All Fields] OR ("long"[All Fields] AND "term"[All Fields] AND "care"[All Fields]) OR "long term care"[All Fields]                                                                                                                                                                                 | 158,645      |
| #25      | Primary care                     | "primary health care"[MeSH Terms] OR ("primary"[All Fields] AND "health"[All Fields] AND "care"[All Fields]) OR "primary health care"[All Fields] OR ("primary"[All Fields] AND "care"[All Fields]) OR "primary care"[All Fields]                                                                                                                                                                      | 519,348      |
| #26      | Community healthcare             | "community health services"[MeSH Terms] OR ("community"[All Fields] AND "health"[All Fields] AND "services"[All Fields]) OR "community health services"[All Fields] OR ("community"[All Fields] AND "healthcare"[All Fields]) OR "community healthcare"[All Fields]                                                                                                                                    | 453,397      |
| #27      | Community dwelling               | "independent living"[MeSH Terms] OR ("independent"[All Fields] AND "living"[All Fields]) OR "independent living"[All Fields] OR ("community"[All Fields] AND "dwelling"[All Fields]) OR "community dwelling"[All Fields]                                                                                                                                                                               | 55,793       |
| #28      | Community nursing                | ("community"[All Fields] AND "nursing"[All Fields]) OR "community nursing"[All Fields]                                                                                                                                                                                                                                                                                                                 | 85,995       |
| #29      | Home healthcare                  | ("home environment"[MeSH Terms] OR ("home"[All Fields] AND "environment"[All Fields]) OR "home environment"[All Fields] OR "home"[All Fields]) AND ("delivery of health care"[MeSH Terms] OR ("delivery"[All Fields] AND "health"[All Fields] AND "care"[All Fields]) OR "delivery of health care"[All Fields] OR "healthcare"[All Fields] OR "healthcare s"[All Fields] OR "healthcares"[All Fields]) | 68,971       |
| #30      | Home nursing                     | "home nursing"[MeSH Terms] OR ("home"[All Fields] AND "nursing"[All Fields]) OR "home nursing"[All Fields]                                                                                                                                                                                                                                                                                             | 72,058       |

|     |              |                                                                                                                                                                                               |           |
|-----|--------------|-----------------------------------------------------------------------------------------------------------------------------------------------------------------------------------------------|-----------|
| #31 | Nursing home | "nursing homes"[MeSH Terms] OR ("nursing"[All Fields] AND "homes"[All Fields]) OR "nursing homes"[All Fields] OR ("nursing"[All Fields] AND "home"[All Fields]) OR "nursing home"[All Fields] | 99,292    |
| #32 | Combination: | #24 OR #25 OR #26 OR #27 OR #28 OR #29 OR 30 OR #31                                                                                                                                           | 1,155,165 |

| PubMed   | Combination of blocks |                     | 19. Jan 2022 |
|----------|-----------------------|---------------------|--------------|
| Search # | Query                 | Search string       | Results      |
| #33      | Combination (P):      | #4 OR #14 OR #22    | 8,752,419    |
| #34      | Combination (PIC):    | #23 AND #32 AND #33 | 11,877       |
